# Supplementary material
Source: Research Square preprint supplement (doi:10.21203/rs.3.rs-9705796/v1)
Supplement: Supplementary file 1 [file 04d20255c1d2cf1e4c2be822.xlsx]

## Sheet: Supplementary table 3
	N-terminal BTB/POZ (covered by fragments 1-3) Plasmodium specific: codons 18-225, Apicomplexa-specific: codons 225-345, BTB/POZ: codons 346-439
	Fragment 1
	Region	Province	Site	DBS samples	N* frag 1 succes seq	Number of non-syn mut	Non syn mut/province (succs seq) %	Codon changes (mutations)	Number of syn mut	Syn mut/provins (succes seq) %	Codon changes (mutations)
	North	Tshopo	Kabondo	176
	North	Sud-Ubangi	Gemena	150	97	6	6.2	R101G, S107P, G112E (2), N138I, T149S	5	5.2	N87N , L119L (3), N158N
	North	Mongala	Lisala	150	82	5	6.1	G112E, K124N, N147D, T149S, T165A	2	2.4	E77E, L119L
	East	Ituri	Bunia	150	74	3	4.1	F94S, N104S, K114Q	4	5.4	L84L, L119L (2), T144T
	East	Sud-Kivu	Katana	69	67	5	7.5	M81T, F45Y (2), K124N, H136N	0	0.0	-
	East	Tanganyika	Kalemie	150	69	2	2.9	G112E, T126I	5	7.2	S74S (3), S78S, L119L
	East	Nord-Kivu	Rutshuru	200
	East	Maniema	Kalima	179	167	12	7.2	F45Y (2), L62I, L99V (2),M106V, S107P, G112E, H136R, H136N (2), M157T	4	2.4	S74S, L119L (3)
	South	Haut-Lomami	Kamina	92	59	5	8.5	N47D (2), E77G, K124N, T149S	2	3.4	L119L, N142N
	South	Lualaba	Fungurume	68	52	5	9.6	N47S, K114Q (2), K124N (2)	1	1.9	L119L
	South	Haut Katanga	Kapolowe	180
	South	Kasai Central	Mikalayi	180
	West	Tshuapa	Boende	179
	West	Mai Ndombe	Inongo	150	97	8	8.2	H136N, T149N (2), T149S, I153L, R101G, M157I, S159P	7	7.3	K114K, L119L (4), T126T, N154N
	West	Kwilu	Vanga	177	144	8	5.6	S36T, L62I (2), L62P, G112E(2), K124N, N137S	3	2.1	S74S, L119L (2)
	West	Kongo Central	Kimpese	200
	Total			2450	908	59			33
	Fragment 2
	Region	Province	Site	DBS samples	N* frag 2 succes seq	Number of non-syn mut	Non syn mut/province (succs seq) %	Codon changes (mutations)	Number of syn mut	Syn mut/provins (succes seq) %	Codon changes (mutations)
	North	Tshopo	Kabondo	176
	North	Sud-Ubangi	Gemena	150	94	66	70.2	A175T, K189T (52), K189N (3), S191P, K202E, R255K (4), L258M, N271H, E276K, R301Q,	2	2.1	V196V, K248K
	North	Mongala	Lisala	150	102	38	37.3	K189T (29), K189N (2), K202R, L230I, R255K (5)	1	1.0	D221D
	East	Ituri	Bunia	150	73	38	52.1	K189T (36),K189N, F302S	0	0.0	-
	East	Sud-Kivu	Katana	69	70	23	32.9	K189T (17), R255K (3), L258M (3)	0	0.0	-
	East	Tanganyika	Kalemie	150	71	25	35.2	K189T (22), K189N,A212V, E294G	0	0.0	-
	East	Nord-Kivu	Rutshuru	200
	East	Maniema	Kalima	179	169	64	37.9	T144K, S182T(3), K189T (47), K189N (7), L258M (2), R255K (4)	1	0.6	L258L
	South	Haut-Lomami	Kamina	92	86	21	24.4	K189T (14), K189N, R255K (4), L258M, Q271R	0	0.0	-
	South	Lualaba	Fungurume	68	53	15	28.3	A175T, K189T (9), K189N (2), R255K (3)	0	0.0	-
	South	Haut Katanga	Kapolowe	180
	South	Kasai Central	Mikalayi	180
	West	Tshuapa	Boende	179
	West	Mai Ndombe	Inongo	150	95	44	46.3	L187F, K189T (30) , K189N (3), F171I, E201K, K202R, N217H, R255K (3), R257Q, L258M (2),	2	2.1	T199T , R255R
	West	Kwilu	Vanga	177	174	68	39.1	A175T, K189T (48), K189N (10), I238V, R255K (4), L258M (3), E276G	1	0.6	T207T
	West	Kongo Central	Kimpese	200
	Total			2450	987	402			7
	Fragment 3
	Region	Province	Site	DBS samples	N* frag 3 succes seq	Number of non-syn mut	Non syn mut/province (succs seq) %	Codon changes (mutations)	Number of syn mut	Syn mut/provins (succes seq) %	Codon changes (mutations)
	North	Tshopo	Kabondo	176
	North	Sud-Ubangi	Gemena	150	91	1	1.1	E297K	0	0.0	-
	North	Mongala	Lisala	150	99	1	1.0	K295E	0	0.0	-
	East	Ituri	Bunia	150	100	0	0.0	-	1	1.0	R365R
	East	Sud-Kivu	Katana	69	68	1	1.5	E312G	0	0.0	-
	East	Tanganyika	Kalemie	150	80	1	1.3	H366Y	0	0.0	-
	East	Nord-Kivu	Rutshuru	200
	East	Maniema	Kalima	179	169	2	1.2	Q271H, E369K	3	1.8	I291I, K324K,L368L
	South	Haut-Lomami	Kamina	92	87	1	1.1	K378E	1	1.1	I313I
	South	Lualaba	Fungurume	68	54	0	0.0	-	1	1.9	H298H
	South	Haut Katanga	Kapolowe	180
	South	Kasai Central	Mikalayi	180
	West	Tshuapa	Boende	179
	West	Mai Ndombe	Inongo	150	88	2	2.3	E335A, E362G	4	4.5	K339K, A347A, V356V (2)
	West	Kwilu	Vanga	177	175	0	0.0	-	1	0.6	I313I
	West	Kongo Central	Kimpese	200
	Total			2450	1011	9			11
