# Supplementary material
Source: Research Square preprint supplement (doi:10.21203/rs.3.rs-9705796/v1)
Supplement: Supplementary file 2 [file 1a408e0cd3bf32d680852099.xlsx]

## Sheet: Supplementary table 1
Gene	Gene name	3D7 reference ID	Chromosome	3D7 RefSeq (NCBI)	Primer ref	Primer sequence 5'-3' (overhang for index marked in bold)	Conditions (if not as described in the overall protocol)	Key codons covered
Pfk13	Kelch protein K13	PF3D7_1343700	Chr 13	NC_004331.3	Nag et al, 2019	K13.1-2_OUT_FW ATGGAAGGAGAAAAAGTAAAAACAAAAGC K13.1-2_OUT_Rev TCTTCATCAAATCGTTTCCTATGTT K13.3-5_OUT_Rev GCTATTAAAACGGAGTGACCAAATCTG K13.3-5_OUT_FW GAGTACGATTGTACAAAGAATTAGAAAACCG K13.1_NEST_FW TCGTCGGCAGCGTCAGATGTGTATAAGAGACAGCTATGACGTATGATAGGGAATCTGGTG K13.1_NEST_Rev GTCTCGTGGGCTCGGAGATGTGTATAAGAGACAGCAGGTTGGTATTCATAATTGATGGAGAATTC K13.2_NEST_FW TCGTCGGCAGCGTCAGATGTGTATAAGAGACAGCTGACAGCAAATAATATA…	As this described protocol	Almost the entire Pfk13 gene
Pfcrt	Chloroquine resistance transporter	PF3D7_0709000	Chr 7	NC_004328.3	Nag et al, 2019	CRT_OUT_FW TGACGAGCGTTATAGAGAATTAG CRT_OUT_Rev GATTGGATATTTCCAGTAGTTC CRT_NEST_FW TCGTCGGCAGCGTCAGATGTGTATAAGAGACAGTGGCTCACGTTTAGGTGGAGGTTCTTG CRT_NEST_Rev GTCTCGTGGGCTCGGAGATGTGTATAAGAGACAGCAGGCATCTAACATGGATATAGC	As this described protocol	72-76
Pfmdr1	Multidrug resistance protein 1	PF3D7_0523000	Chr 5	NC_004326.2	Nag et al, 2019	MDR1.1_OUT_FW ATGGGTAAAGAGCAGAAAGAGAA MDR1.1_OUT_Rev ATGGATATAACTGAGGCACCATTA MDR2_OUT_Rev TGGTCCAACATTTGTATCATATTTATTTGG MDR2_OUT_FW TTTGCATTTAGTTCAGATGATGAAATG MDR1.1_NEST_FW TCGTCGGCAGCGTCAGATGTGTATAAGAGACAGCATTTGTATGTGCTGTATTATCAGGAGGAA MDR1.1_NEST_Rev GTCTCGTGGGCTCGGAGATGTGTATAAGAGACAGAGCCTCTTCTATAATGGACATGGTATTGTT MDR2_NEST_FW TCGTCGGCAGCGTCAGATGTGTATAAGAGACAGAGAATTATTGTAAATGCAGCTTTATGGG MD…	As this described protocol	86, 184, 1034, 1042, 1246
Pfdhfr	Bifunctional dihydrofolate reductase-thymidylate synthase	PF3D7_0417200	Chr 4	NC_004318.2	Nag et al, 2019	DHFR_OUT_FW ATGATGGAACAAGTCTGCGACGTTTTCGA DHFR_OUT_Rev GTTGTATTGTTACTAGTATATACATCGCTA DHFR_NEST_FW TCGTCGGCAGCGTCAGATGTGTATAAGAGACAGATGCCATATGTGCATGTTGTAAGGTTGA DHFR_NEST_Rev GTCTCGTGGGCTCGGAGATGTGTATAAGAGACAGCTAAAAATTCTTGATAAACAACGGAACCTCC	As this described protocol	51,59,108,164
Pfdhps	Hydroxymethyldihydropterin pyrophosphokinase-dihydropteroate synthase	PF3D7_0810800	Chr 8	NC_004329.3	Nag et al, 2019	DHPS_OUT_FW ACAAATATGTGAGTAGGATGAAAGAACAA DHPS_OUT_Rev CATCCAATTGTGTGATTTGTCCACAATAT DHPS_NEST_FW TCGTCGGCAGCGTCAGATGTGTATAAGAGACAGGGAATATTAAATGTTAATTATGATTCT DHPS_NEST_Rev GTCTCGTGGGCTCGGAGATGTGTATAAGAGACAGATTACAACATTTTGATCATTCATGCA	As this described protocol	431, 436, 437, 540, 581, 613
Pfaat1	Amino acid transporter 1	PF3D7_0629500	Chr 6	NC_004327.3	Amambua-Ngwa et al. 2023	AAT1_OUT_FW AGTACGGTACTTTTTATATGTACAGCT AAT1_OUT_rev TGCATTTGGTTGTTGAGAGAAGG AAT1_NEST_FW TCGTCGGCAGCGTCAGATGTGTATAAGAGACAGTGTACCTCGTCATTAGAACATAATACA AAT1_NEST_rev GTCTCGTGGGCTCGGAGATGTGTATAAGAGACAGTGTTGAAATAGATAGAACACTAACAGT	Outer annealing temperature 52°C Nested annealing temperature 54°C	258, 313
Pfexo	Exonuclease	PF3D7_1362500	Chr 13	NC_004327.3	Makenga et al. 2022	EXO_OUT_FW CTTTAACGAATGGAGTCATTTAGCAGCA EXO_OUT_Rev TTTGATTGAATCATATCTCTATTCAATG EXO_NEST_FW TCGTCGGCAGCGTCAGATGTGTATAAGAGACAGTGTTAACATTTTGAAAAGATCAATTGA EXO_NEST_Rev GTCTCGTGGGCTCGGAGATGTGTATAAGAGACAGTGTTGAAATAGATAGAACACTAACAGT	As this described protocol	415
Pfubp1	Ubiquitin carboxyl-terminal hydrolase 1	PF3D7_0104300	Chr 1	NC_004325.2	Henriques et al 2014 (fragment 1) & Luzolo et al. 2026 (submitted) (fragment 2)	UBP1-FRAG 1_OUT-FW CGCCCGTACTATGAAGAAGATC UBP1-FRAG 1_OUT-Rev GGCTTTTACCTGAACTGTTCAGG UBP1-FRAG 2_OUT-FW CGGCTCAGACCAACATGATC UBP1-FRAG 2_OUT-Rev CGGTTAAGAATTAATATCAAGTGAC UBP1-FRAG 1_NEST-FW TCGTCGGCAGCGTCAGATGTGTATAAGAGACAGCGTAAACAGAATATTCAGGATTGC UBP1-FRAG 1_NEST-Rev GTCTCGTGGGCTCGGSGSTGTGTATAAGAGACAGCTAGCCCTTTATTATCATTATCG UBP1-FRAG 2_NEST-FW TCGTCGGCAGCGTCAGATGTGTATAAGAGACAGACCGTGTGAGTCCCAAT…	Outer PCR fragment 1 95°C 15 min, (95°C 30 s, 55°C 45s, 68°C 30s) x 30 cycles, 68°C 10 min Outer PCR fragment 2 95°C 15 min, (95°C 30 s, 55°C 45s, 62°C 30s) x 30 cycles, 62°C 10 min Nested PCR fragment 1 95°C 15 min, (95°C 30 s, 55°C 45s, 68°C 30s) x 30 cycles, 68°C 10 min Nested PCR fragment 1 95°C 15 min, (95°C 30 s, 57°C 45s, 62°C 30s) x 30 cycles, 62°C 10 min	1525, 1528, 1531, 1534, 3138 ,3275
Pfcoronin	Coronin	PF3D7_1251200	Chr 12	NC_037284.1	Luzolo et al. 2026 (submitted) (outer) Ajibaye et al. 2024 (nested)	COR_OUT-FW CTGTACGGAGACTTGAGGAT COR_OUT_Rev TGTCTCATGACAGAACCCTT COR_NEST_FW TCGTCGGCSGCGTCAGATGTGTATAAGAGACAGATGGCAAGTTGAAGGGGGAG COR_NEST_Rev GTCTCGTGGGCTCGGSGSTGTGTATAAGAGACAGTTGTCTTCACCACCAAATCCA	Outer PCR 95°C 15 min, (95°C 30 s, 56°C 45s, 69°C 30s) x 35 cycles, 68°C 10 min Nested PCR 95°C 15 min, (95°C 30 s, 56°C 45s, 69°C 30s) x 35 cycles, 68°C 10 min	50, 76, 100
Pfcsp	Circumsporozoite protein	PF3D7_0304600	Chr 3	NC_000521.4	Lerch et al. 2017	CSP_OUT_FW ATCAAGGTAATGGACAAG CSP_OUT_Rev ACTCAAACTAAGATGTGTTC CSP_NEST_FW TCGTCGGCSGCGTCAGATGTGTATAAGAGACAGAAATGACCCAAACCGAAATGT CSP_NEST_Rev GTCTCGTGGGCTCGGAGATGTGTATAAGAGACAGGGAACAAGAAGGATAATACCA	As this described protocol	polymorphic region
Pfcpmp	Conserved Plasmodium membrane protein	PF3D7_0104100	Chr 1	NC_004325.2	Lerch et al. 2017	CPMP_OUT_FW CGATACAGGACATATAGA CPMP_OUT_Rev TTCAATAACATTTACTAGG CPMP_NEST_FW TCGTCGGCAGGCGTCAGATGTGTSTSSGSGSCAGCATAAGTCATTAAAATTTATGGAT CPMP_NEST_Rev GTCTCGTGGGCTCGGSGSTGTGTATAAGAGACAGCGTTACTATCAAGATCGTTAATATC	As this described protocol	polymorphic region
Pf mitochondrial genome		—	—	NC_002375.1	Nag et al. 2017	Mito1_FW TCGTCGGCAGCGTCAGATGTGTATAAGAGACAGCTTCCCTTCTCGCCATTTGATAGCGG Mito1_Rev GTCTCGTGGGCTCGGAGATGTGTATAAGAGACAGGAAAAAGGAATGAGTTTTGAAATCTCTAGTA Mito2_FW TCGTCGGCAGCGTCAGATGTGTATAAGAGACAGGATATGATAAATGTAAATACTCTGTAGTTTG Mito2_Rev GTCTCGTGGGCTCGGAGATGTGTATAAGAGACAGCCTGCATTAACATCATTATATGGTACATC Mito3_FW TCGTCGGCAGCGTCAGATGTGTATAAGAGACAGCAGTAATACTACGTACTGAATTATATTCTTC Mito3_Rev GTCTCGTGGGCTCGGAGATGTG…	Mito fragments 1 and 3 as multiplex single PCR, Annealing temperature of 57°C, otherwise same conditions as nested in this protocol	cytb region partially covered, 772, 853, 973, 1283, 2383
