# Supplementary material
Source: Research Square preprint supplement (doi:10.21203/rs.3.rs-9705796/v1)
Supplement: Supplementary file 3 [file 6025bbaf2597e950d631d47f.xlsx]

## Sheet: Supplementary table 4A-D
4A	Propeller domains 1-6 (covered by fragments 4 & 5) Domain 1: codons 443-473, domain 2: codons 474-526, domain 3: codons 527-573, domain 4: codons 574-614, domain 5: codons 615-666, domain 6. codons 667-708	Non syn mt	North	East	South	West	N	%		4B	Propeller domains 1-6 (covered by fragments 4 & 5) Domain 1: codons 443-473, domain 2: codons 474-526, domain 3: codons 527-573, domain 4: codons 574-614, domain 5: codons 615-666, domain 6. codons 667-708	Syn	North	East	South	West	N	%		4C	N-terminal BTB/POZ domains (covered by fragments 1-3) Plasmodium specific: codons 18-225, Apicomplexa-specific: codons 225-345, BTB/POZ: codons 346-439	Non syn mt	North	East	South	West	N	%		4D	N-terminal BTB/POZ domains (covered by fragments 1-3) Plasmodium specific: codons 18-225, Apicomplexa-specific: codons 225-345, BTB/POZ: codons 346-439	Syn	North	East	South	West	N	%
		P441L	0	1	0	0	1	0.2				F442F	0	0	0	2	2	1.3				S36T	0	0	0	1	1	0.2				S74S	0	4	0	1	5	3.3
		V445I	0	0	0	1	1	0.2				G449G	0	0	0	1	1	0.7				F45Y	0	4	0	0	4	0.7				E77E	1	0	0	0	1	0.7
		G450E	0	1	0	0	1	0.2				Y456Y	0	1	1	0	2	1.3				N47D	0	0	2	0	2	0.3				S78S	0	1	0	0	1	0.7
		G450R	0	0	1	0	1	0.2				Q468Q	0	0	0	1	1	0.7				N47S	0	0	1	0	1	0.2				L84L	0	1	0	0	1	0.7
		G453S	0	1	0	0	1	0.2				C469C	1	4	4	1	10	6.6				L62I	0	1	0	2	3	0.5				N87N	1	0	0	0	1	0.7
		G453D	0	1	0	0	1	0.2				R471R	2	3	3	11	19	12.5				L62P	0	0	0	1	1	0.2				K114K	0	0	0	1	1	0.7
		E455K	1	0	0	0	1	0.2				P475P	1	0	0	0	1	0.7				E77G	0	0	1	0	1	0.2				L119L	4	6	2	6	18	11.8
		L463*stop	0	1	0	0	1	0.2				S477S	0	1	1	0	2	1.3				M81T	0	1	0	0	1	0.2				T126T	0	0	0	1	1	0.7
		I465T	1	0	0	1	2	0.3				T478T	0	2	2	1	5	3.3				F94S	0	1	0	0	1	0.2				N142N	0	0	1	0	1	0.7
		S466N	1	0	0	1	2	0.3				L488L	0	0	0	1	1	0.7				L99V	0	2	0	0	2	0.3				T144T	0	1	0	0	1	0.7
		Q467R	0	0	1	0	1	0.17452				G496G	0	0	0	1	1	0.7				R101G	1	0	0	1	2	0.3				N154N	0	0	0	1	1	0.7
		V478I	1	0	0	1	2	0.3				R529R	0	1	1	0	2	1.3				N104S	0	1	0	0	1	0.2				N158N	1	0	0	0	1	0.7
		G484R	1	0	0	0	1	0.2				T535T	1	0	0	1	2	1.3				M106V	0	1	0	0	1	0.2				V196V	1	0	0	0	1	0.7
		F491L	1	0	0	1	2	0.3				A557A	1	1	1	0	3	2.0				S107P	1	1	0	0	2	0.3				T199T	0	0	0	1	1	0.7
		V502I	0	1	0	0	1	0.2				A564A	0	1	1	0	2	1.3				G112E	3	2	0	0	5	0.9				T207T	0	0	0	1	1	0.7
		Y502C	0	0	0	1	1	0.2				V568V	1	0	0	1	2	1.3				K114Q	0	1	2	0	3	0.5				D221D	1	0	0	0	1	0.7
		T508I	0	1	0	0	1	0.2				V589V	1	0	0	0	1	0.7				G122E	0	0	0	2	2	0.3				K248K	1	0	0	0	1	0.7
		E509G	0	0	0	1	1	0.2				E612E	1	0	0	0	1	0.7				K124N	1	1	3	1	6	1.0				R255R	0	0	0	1	1	0.7
		D516A	0	1	0	0	1	0.2				P615P	1	0	0	0	1	0.7				T126I	0	1	0	0	1	0.2				L259L	0	1	0	0	1	0.7
		W518Stop*	0	0	0	1	1	0.2				A621A	1	0	0	0	1	0.7				H136N	0	3	0	1	4	0.7				I291I	0	1	0	0	1	0.7
		P527S	0	1	0	0	1	0.2				A627A	0	1	1	0	2	1.3				H136R	0	1	0	0	1	0.2				H298H	0	0	1	0	1	0.7
		R528S	0	1	0	0	1	0.2				E643E	0	1	1	0	2	1.3				N137S	0	0	0	1	1	0.2				I313I	0	0	1	1	2	1.3
		V534A	0	0	1	0	1	0.2				S649S	0	1	1	1	3	2.0				N138I	1	0	0	0	1	0.2				K324K	0	1	0	0	1	0.7
		T535A	0	0	0	1	1	0.2				P655P	0	1	1	1	3	2.0				T144K	0	1	0	0	1	0.2				K339K	0	0	0	1	1	0.7
		I540T	1	0	0	0	1	0.2				K658K	0	0	0	1	1	0.7				N147D	1	0	0	0	1	0.2				A347A	0	0	0	1	1	0.7
		Y541H	0	1	0	1	2	0.3				F662F	0	1	1	1	3	2.0				T149S	2	0	1	1	4	0.7				V356V	0	0	0	2	2	1.3
		G544R	1	0	0	0	1	0.2				A676A	0	0	0	3	3	2.0				T149N	0	0	0	2	2	0.3				R365R	0	1	0	0	1	0.7
		G544V	1	0	0	1	2	0.3				L678L	0	1	1	0	2	1.3				I153L	0	0	0	1	1	0.2				L368L	0	1	0	0	1	0.7
		E556K	0	0	1	0	1	0.2				S679S	0	0	0	1	1	0.7				M157T	0	1	0	0	1	0.2				G392G	0	0	0	3	3	2.0
		A557S	0	0	0	1	1	0.2				S681S	7	3	3	1	14	9.2				S159P	0	0	0	1	1	0.2				L396L	0	0	0	1	1	0.7
		R561H	1	0	0	0	1	0.2				G687G	0	0	0	1	1	0.7				T165A	1	0	0	0	1	0.2				P417P	0	2	8	0	10	6.6
		M562I	0	0	1	0	1	0.2				G690G	1	0	0	0	1	0.7				F171I	0	0	0	1	1	0.2				A427A	0	0	1	0	1	0.7
		K563R	1	0	0	0	1	0.2				E691E	0	0	0	1	1	0.7				A175T	1	0	1	1	3	0.5				L428L	1	0	1	0	2	1.3
		V566A	0	0	0	1	1	0.2				S695S	0	0	0	1	1	0.7				S182T	0	3	0	0	3	0.5
		E567G	0	0	0	1	1	0.2				F698F	0	0	0	1	1	0.7				L187F	0	0	0	1	1	0.2
		V568M	1	0	2	0	3	0.5														K189T	81	122	23	78	304	53.1
		A569S	0	0	2	0	2	0.3														K189N	5	9	3	13	30	5.2
		M571I	0	0	0	1	1	0.2														S191P	1	0	0	0	1	0.2
		T573I	1	0	0	0	1	0.2														E201K	0	0	0	1	1	0.2
		A578S	6	2	7	1	16	2.8														K202R	1	0	0	1	2	0.3
		M579V	0	0	0	1	1	0.2														K202E	1	0	0	0	1	0.2
		V589I	0	0	1	0	1	0.2														A212V	0	1	0	0	1	0.2
		G592R	0	0	2	0	2	0.3														N217H	0	0	0	1	1	0.2
		E596K	0	0	0	1	1	0.2														L230I	1	0	0	0	1	0.2
		S600P	1	0	0	0	1	0.2														I238V	0	0	0	1	1	0.2
		E602K	0	1	0	0	1	0.2														R255K	9	7	7	7	30	5.2
		Q613E	0	2	0	4	6	1.0														R257Q	0	0	0	1	1	0.2
		A617T	1	0	0	0	1	0.2														L258M	1	3	1	5	10	1.7
		A621T	1	1	0	1	3	0.5														Q271H	0	1	0	0	1	0.2
		A627V	0	0	1	0	1	0.2														N271H	1	0	0	0	1	0.2
		V637I	0	1	0	0	1	0.2														Q271R	0	0	1	0	1	0.2
		G639D	0	0	1	0	1	0.2														E276K	1	0	0	0	1	0.2
		V650F	0	1	0	1	2	0.3														E276G	0	0	0	1	1	0.2
		N657D	1	0	0	0	1	0.2														E294G	0	1	0	0	1	0.2
		G665S	1	0	0	0	1	0.2														K295E	1	0	0	0	1	0.2
		V666A	1	0	0	0	1	0.2														E297K	1	0	0	0	1	0.2
		X681P	0	1	0	1	2	0.3														R301Q	1	0	0	0	1	0.2
		G690D	0	1	0	1	2	0.3														F302S	0	1	0	0	1	0.2
		S695T	1	1	0	2	4	0.7														E312G	0	1	0	0	1	0.2
																						E335A	0	0	0	1	1	0.2
																						E362G	0	0	0	1	1	0.2
																						H366Y	0	1	0	0	1	0.2
																						E369K	0	1	0	0	1	0.2
																						K378E	0	0	1	0	1	0.2
																						D397N	0	0	1	0	1	0.2
																						E401K	0	0	0	1	1	0.2
																						P417L	0	0	0	1	1	0.2
																						K420R	1	0	0	0	1	0.2
																						E426K	0	0	1	0	1	0.2
																						A427S	0	0	1	0	1	0.2
																						K430R	0	1	0	0	1	0.2
																						A432T	0	0	0	1	1	0.2
																						K438R	0	0	0	1	1	0.2
