# Supplementary material
Source: Research Square preprint supplement (doi:10.21203/rs.3.rs-9705796/v1)
Supplement: Supplementary file 4 [file 9fa7ff6468cba3a26b512261.xlsx]

## Sheet: Supplementary table 2
	Propeller domain 1-6 (covered by fragments 4 & 5) Domain 1: codons 443-473, domain 2: codons 474-526, domain 3: codons 527-573, domain 4: codons 574-614, domain 5: codons 615-666, domain 6. codons 667-708
	Fragment 4
	Region	Province	Site	DBS samples	N* frag 4 succs seq	Number of non-syn mut	Non syn mut/provins (succes seq) %	Codon changes (mutations)	Number of syn mut	Syn mut/provins (succes seq) %	Codon changes (mutations)
	North	Tshopo	Kabondo	176	173	5	2.9	E455K, I465T, S466N, V478I, F491L	5	2.9	L428L, C469C, R471R (2), V568V
	North	Sud-Ubangi	Gemena	150	94	1	1.1	G484R	2	2.1	T535T, A557A
	North	Mongala	Lisala	150	79	4	5.1	K420R, I540T, G544R ,G544V	1	1.3	P475P
	East	Ituri	Bunia	150	76	0	0	-	0	0.0	-
	East	Sud-Kivu	Katana	69	54	0	0.0	-	1	1.9	P417P
	East	Tanganyika	Kalemie	150	80	5	6.3	K430R, L463Stop*, T508I, D516A, R528S	3	3.8	Y456Y, C469C, A557A
	East	Nord-Kivu	Rutshuru	200	150	4	2.7	P441L, G450E, G453D, Y541H	5	3.3	R471R (3), T478T (2)
	East	Maniema	Kalima	179	169	2	1.2	G453S, V502I	6	3.6	P417P, C469C (3), S477S, R529R
	South	Haut-Lomami	Kamina	92	61	2	3.3	Q467R, V534A	2	3.3	C469C, R529R
	South	Lualaba	Fungurume	68	53	0	0.0	-	4	7.5	P417P (2),A427A, C469C
	South	Haut Katanga	Kapolowe	180	142	3	2.1	E426K, G450R, E556K	10	7.0	P417P (6), L428L, C469C, R471R, T478T
	South	Kasai Central	Mikalayi	180	116	2	1.7	D397N, A427S	2	1.7	T478T (2)
	West	Tshuapa	Boende	179	166	6	3.6	K438R, I465T, S466N, V478I, F491L, Y541H	9	5.4	G392G (3), L396L, Q468Q, R471R (3), T478T
	West	Mai Ndombe	Inongo	150	88	5	5.7	P417L, A432T, V445I, T535A, G544V, E509G	4	5.7	C469C, F442F, G449G, G496G
	West	Kwilu	Vanga	177	140	3	2.1	Y502C,W518stop*, A557S	5	3.6	S425S, R471R (2), L488L ,T535T
	West	Kongo Central	Kimpese	200	170	1	0.6	E401K	7	4.1	F442F, R471R (6)
	Total			2450	1811	43			67
	Fragment 5
	Region	Province	Site	DBS samples	N* frag 5 succes seq	Number of non-syn mut	Non syn mut/provins (succes seq) %	Codon changes (mutations)	Number of syn mut	Syn mut/provins (succes seq) %	Codon changes (mutations)
	North	Tshopo	Kabondo	176	171	11	6.4	A578S (6), R561H, K563R, A617T, A621T, S695T	5	2.9	V589V, A621A, E612E, P615P, S681S,
	North	Sud-Ubangi	Gemena	150	91	5	5.5	V568M, T573I, N657D, G665S, V666A	1	1.1	G690G
	North	Mongala	Lisala	150	79	1	1.3	S600P	6	7.6	S681S (6)
	East	Ituri	Bunia	150	77	0	0	-	0	0.0	-
	East	Sud-Kivu	Katana	69	54	0	0.0	-	3	5.6	S681S (3)
	East	Tanganyika	Kalemie	150	80	4	5.0	P572S, A578S, E602K, Q613E	2	2.5	A564A, L678L
	East	Nord-Kivu	Rutshuru	200	151	6	4.0	Q613E, V637I, V650F, X681P, G690D, S695T	3	2.0	S649S, P655P, F662F
	East	Maniema	Kalima	179	169	2	1.2	A578S, A621T	2	1.2	A627A,E643E
	South	Haut-Lomami	Kamina	92	61	5	8.2	A627V, V568M (2), A569S (2)	0	0.0	-
	South	Lualaba	Fungurume	68	53	0	0.0	-	0	0.0	-
	South	Haut Katanga	Kapolowe	180	139	8	5.8	A578S (5), V589I, G592R, G639D	0	0.0	-
	South	Kasai Central	Mikalayi	180	116	3	2.6	M562I, A578S (2)	0	0.0	-
	West	Tshuapa	Boende	179	164	4	2.4	E567G, A621T, V650F, S695T	3	1.8	P655P, S681S, G687G
	West	Mai Ndombe	Inongo	150	89	1	1.1	V566A	5	5.6	K658K, V568V, A676A (3)
	West	Kwilu	Vanga	177	140	4	2.9	A578S , Q613E (3)	2	1.4	S679S, E691E
	West	Kongo Central	Kimpese	200	169	6	3.6	M579V, E596K, Q613E, X681P, G690D, S695T	4	2.4	S649S, F662F, S695S, F698F
	Total			2450	1803	60			36
