# Supplementary material
Source: Research Square preprint supplement (doi:10.21203/rs.3.rs-9705796/v1)
Supplement: Supplementary file 5 [file b0a98dff0d56c772492bf9ee.xlsx]

## Sheet: Supplementary table 5
	Region	NORTH						EAST
	Province	Tshopo		Sud-Ubangi		Mongala		Ituri		Sud-Kivu		Tanganyika		Nord-Kivu		Maniema
	Site	Kabondo		Gemena		Lisala		Bunia		Katana		Kalemie		Rutshuru		Kalima
	N collected	176		150		150		150		69		150		200		179
	CRT	N	%	N	%	N	%	N	%	N	%	N	%	N	%	N	%
	CVMNK	160	96.9697	70	97.2222	32	100	74	82.2222	3	5.88235	71	98.6111	22	15.8273	164	94.7977
	CVIET	5	3.0303	2	2.77778	0	0	16	17.7778	48	94.1176	1	1.38889	117	84.1727	9	5.20231
	Total	165	100	72	100	32	100	90	100	51	100	72	100	139	100	173	100
	MDR1
	NYSND	68	51.1278	7	46.6667	15	78.9474	27	54	8	21.6216	36	66.6667	30	30.303	93	62.8378
	YFSND	5	3.7594	0	0	0	0	0	0	1	2.7027	0	0	3	3.0303	0	0
	NFSND	60	45.1128	8	53.3333	4	21.0526	21	42	15	40.5405	17	31.4815	39	39.3939	53	35.8108
	YYSND	0	0	0	0	0	0	0	0	7	18.9189	1	1.85185	4	4.0404	0	0
	YYSNY	0	0	0	0	0	0	0	0	4	10.8108	0	0	12	12.1212	0	0
	NYCND	0	0	0	0	0	0	0	0	1	2.7027	0	0	0	0	1	0.675676
	NYSNY	0	0	0	0	0	0	1	2	1	2.7027	0	0	9	9.09091	0	0
	NFCND	0	0	0	0	0	0	0	0	0	0	0	0	0	0	1	0.675676
	NFSNY	0	0	0	0	0	0	1	2	0	0	0	0	2	2.0202	0	0
	Total	133	100	15	100	19	100	50	100	37	100	54	100	99	100	148	100
	Codon 86
	N	157	93.4524	21	100	29	100	99	99	28	50	87	98.8636	122	84.7222	177	98.8827
	Y	7	4.16667	0	0	0	0	0	0	16	28.5714	1	1.13636	12	8.33333	0	0
	NY	4	2.38095	0	0	0	0	1	1	12	21.4286	0	0	10	6.94444	2	1.11732
	Codon 184
	Y	87	51.7857	8	38.0952	27	54	30	37.9747	31	58.4906	40	45.4545	68	47.2222	96	55.1724
	F	44	26.1905	10	47.619	4	8	26	32.9114	18	33.9623	25	28.4091	42	29.1667	54	31.0345
	YF	37	22.0238	3	14.2857	19	38	23	29.1139	4	7.54717	23	26.1364	34	23.6111	24	13.7931
	Codon 1034
	S	167	100	95	100	33	100	103	100	54	98.1818	83	100	136	99.2701	175	97.7654
	C	0	0	0	0	0	0	0	0	1	1.81818	0	0	1	0.729927	2	1.11732
	SC	0	0	0	0	0	0	0	0	0	0	0	0	0	0	2	1.11732
	Codon 1042
	N	167	100	95	100	33	100	103	100	55	100	83	100	137	100	179	100
	Codon 1246
	D	159	95.2096	95	100	60	100	75	97.4026	44	83.0189	82	100	122	89.0511	173	99.4253
	Y	5	2.99401	0	0	0	0	2	2.5974	6	11.3208	0	0	12	8.75912	0	0
	DY	3	1.79641	0	0	0	0	0	0	3	5.66038	0	0	3	2.18978	1	0.574713
	Region	SOUTH								WEST
	Province	Haut-Lomami		Lualaba		Haut Katanga		Kasai Central		Tshuapa		Mai Ndombe		Kwilu		Kongo Central
	Site	Kamina		Fungurume		Kapolowe		Mikalayi		Boende		Inongo		Vanga		Kimpese
	N collected	92		68		180		180		179		150		177		200
	CRT	N	%	N	%	N	%	N	%	N	%	N	%	N	%	N	%
	CVMNK	66	92.9577	53	96.3636	134	100	98	89.0909	130	83.871	63	100	125	79.1139	110	70.9677
	CVIET	5	7.04225	2	3.63636	0	0	12	10.9091	25	16.129	0	0	33	20.8861	45	29.0323
	Total	71	100	55	100	134	100	110	100	155	100	63	100	158	100	155	100
	MDR1
	NYSND	36	66.6667	32	86.4865	70	70	53	65.4321	55	47.0085	32	66.6667	49	41.5254	73	52.1429
	YFSND	3	5.55556	0	0	0	0	3	3.7037	5	4.2735	0	0	11	9.32203	5	3.57143
	NFSND	13	24.0741	4	10.8108	27	27	22	27.1605	55	47.0085	13	27.0833	26	22.0339	51	36.4286
	YYSND	2	3.7037	0	0	1	1	1	1.23457	0	0	3	6.25	31	26.2712	10	7.14286
	YYSNY	0	0	1	2.7027	1	1	0	0	1	0.854701	0	0	1	0.847458	1	0.714286
	NYCND	0	0	0	0	0	0	0	0	0	0	0	0	0	0	0	0
	NYSNY	0	0	0	0	1	1	0	0	1	0.854701	0	0	0	0	0	0
	NFCND	0	0	0	0	0	0	1	1.23457	0	0	0	0	0	0	0	0
	NFSNY	0	0	0	0	0	0	1	1.23457	0	0	0	0	0	0	0	0
	Total	54	100	37	100	100	100	81	100	117	100	48	100	118	100	140	100
	Codon 86
	N	57	79.1667	51	92.7273	110	83.3333	93	86.1111	152	92.1212	64	92.7536	92	56.4417	148	87.574
	Y	6	8.33333	2	3.63636	11	8.33333	6	5.55556	6	3.63636	3	4.34783	47	28.8344	17	10.0592
	NY	9	12.5	2	3.63636	11	8.33333	9	8.33333	7	4.24242	2	2.89855	24	14.7239	4	2.36686
	Codon 184
	Y	41	57.7465	39	72.2222	64	48.4848	59	55.1402	63	38.1818	37	53.6232	87	55.414	89	52.6627
	F	17	23.9437	4	7.40741	41	31.0606	35	32.7103	66	40	17	24.6377	42	26.7516	58	34.3195
	YF	13	18.3099	11	20.3704	27	20.4545	13	12.1495	36	21.8182	15	21.7391	28	17.8344	22	13.0178
	Codon 1034
	S	74	100	54	100	124	100	101	100	163	100	102	100	166	100	170	100
	C	0	0	0	0	0	0	0	0	0	0	0	0	0	0	0	0
	SC	0	0	0	0	0	0	0	0	0	0	0	0	0	0	0	0
	Codon 1042
	N	74	100	54	100	124	100	101	100	163	100	102	100	166	100	170	100
	Codon 1246
	D	73	100	50	96.1538	111	90.9836	93	92.0792	157	96.319	100	98.0392	158	99.3711	168	98.8235
	Y	0	0	2	3.84615	6	4.91803	5	4.9505	3	1.84049	1	0.980392	1	0.628931	1	0.588235
	DY	0	0	0	0	5	4.09836	3	2.9703	3	1.84049	1	0.980392	0	0	1	0.588235
